# Supplementary material for: Spinal signalling of C-fiber mediated pleasant touch in humans
Source: eLife journal article supplement (doi:10.7554/elife.51642), 2019-12-24
Supplement: supp [file elife-51642-supp-v1.zip]

Archive with 4 entries (4 files):
- elife_poa_e51642_Supplementary_file_3.xlsx
- elife_poa_e51642_Transparent_Reporting_File.pdf
- elife_poa_e51642_Supplementary_file_2.xlsx
- elife_poa_e51642_Supplementary_file_1.xlsx
