# Supplementary material for: Spinal signalling of C-fiber mediated pleasant touch in humans
Source: eLife journal article supplement (doi:10.7554/elife.51642), 2019-12-24
Supplement: supp [file elife-51642-supp-v1.zip › elife_poa_e51642_Supplementary_file_1.xlsx]

## Sheet: Supplementary file 1
	Age	Oncological diagnosis and treatment	Chemotherapy	Radiotherapy	Surgery	Pain location (Approximate dermatomal distribution)	Pain – NRS (average 24 hours / maximum /current)	Post-Lesion Pain -NRS	Medication	Operative medication	Thermocoagulation	Intra-operative sensation
1	50-55	Carcinoma of breast, bone metastases	No	Yes	Yes	Left hip and thigh (L2-L3)	72 / 100 / 36	5	Naproxen, Amitryptiline, Oxycodone	Midazolam 2mg Fentanyl 75 mcg	1 x 25s 75°C	Heat left trunk, upper and lower limb
2	70-75	Mesothelioma, chest wall invasion	No	No	Yes	Right thoracic (T4-T10)	77 / 100 / 61	5	Ibuprofen, Gabapentin, Fentalyl patch	Midazolam 2mg Fentanyl 110 mcg	2 x 25s 75°C, 1x25s 90°C	Burning / stinging right arm and chest
3	50-55	Carcinoma of lung, chest wall invasion	No	Yes	No	Right thoracic and axilla (T2-T4)	90 / 100 / 81	0	Paracetamol, Pregabalin, Lidocaine patch, Lorazepam, Oxycodone, Ketamine	Propofol, Fentanyl 80 mcg	1 x 25s 75°C, 2 x 25s 80°C	Burning right arm, hand, abdomen, chest
4	65-70	Mesothelioma, chest wall invasion	No	No	Yes	Right thoracic (T3-T11)	90 / 94 / 58	0	Paracetamol, Naproxen, Gabapentin, Morphine	Propofol, Fentanyl 110mcg	1x25s 75°C, 2x25s 80°C	Cold sharp freezing blast right upper limb
5	65-70	Mesothelioma, chest wall invasion	Yes - pemetrexed and carboplatin	No	Yes	Right thoracic (T3-T8)	88 / 93 / 52	10	Gabapentin, Oxycodone	Propofol, Fentanyl 120mcg	1 x 25s 70°C, 2 x 25s 78°C, 1 x 25s 84°C	Heat right hand, shoulder and upper trunk
6	60-65	Mesothelioma, chest wall invasion	Yes - pemetrexed and cisplatin	No	Yes	Right thoracic (T3-T8)	81 / 95 / 71	0	Amitriptyline, Oxycodone	Propofol, Fentanyl 140mcg	1x25s 74 °C, 1 x 25s 80°C	Sharp and cold freezing blast right upper limb
7	70-75	Mesothelioma, chest wall invasion	No	No	Yes	Left thoracic (T3-T10)	81 / 100 / 57	30	Gabapentin, Methadone, Oxycodone	Propofol,Midazolam 2mg, Fentanyl 140mcg	1 x 25s 70°C, 1 x 75°C, 2 x 25s 80°C	Heat and sharp pain right trunk, upper and lower limb
8	55-60	Mesothelioma, chest wall invasion	Yes - pemetrexed and cisplatin	No	Yes	Right thoracic (T3-T9)	77 / 94 / 48	0	Pregabalin, Lidocaine Patch, Tramadol, Oxycodone	Propofol, Remifentanyl	2 x 25s 75°C, 1 x 25s 80 °C	Heat right upper limb and upper trunk
9	55-60	Non-small cell lung carcinoma, vertebral and right hip metastases	No		Yes	Right lower limb (L2-L5)	79 /98 /45	0	Ibuprofen, Dexamethazone, Gabapentin, Lorazepam, Oxycodone, Fentanyl IR	Midazolam 2mg, Fentanyl 75 mcg	1 x 25s 75°C, 2 x 25s 80°C, 1 x 25s 85°C	Burning / stinging right upper limb and chest
10	55-60	Mesothelioma, chest wall invasion	Yes - pemetrexed and carboplatin	No	Yes	Left thoracic (T2-T8)	51 / 100 /38	0	Paracetamol, Pregabalin, Morphine, Fentanyl patch	Propofol, Midazolam 2mg, fentanyl 80mcg	1 x 25s 75°C, 1 x 25s 80°C, 2 x 25s 85°C	Heat sensation left upper limb and chest
11	60-65	Carcinoma of Rectum, pelvic metastases	Yes – folinic acid, fluorouracil and irinotecan	No	Yes	Left lower limb (S1-S2)	20 / 88 /48	15	Paracetamol, Pregabalin, Oxycodone	Propofol, Fentanyl 80 mcg	1 x 25s 70 °C, 2 x 25s 80 °C	Heat left trunk, upper and lower limb
12	55-60	Non-small cell lung carcinoma, chest wall invasion	Yes – cisplatin and docetaxel	Yes	Yes	Left thoracic (T5-T10)	65 / 79 / 70	0	Gabapentin, Oxycodone	Propofol, Remifentanyl	2 x 25s 75°C, 1 x 25s 85°C	Heat left upper limb
13	70-75	Mesothelioma, chest wall invasion	Yes - pemetrexed and carboplatin	Yes	Yes	left thoracic (T3-T10)	50 /80 /70	0	Amitrypyiline, Oxycodone	Propofol, Remifentanyl	1 x 25s 75°C, 1 x 25s 80°C	Heat / buring left upper limb and trunk
14	60-65	Mesothelioma, chest wall invasion	Yes - pemetrexed and carboplatin	No	Yes	left thoracic (T2-T8)	65 / 100 / 20	5	Ibuprofen, Amitryptiline, Morphine	Propofol, Remifentanyl	1 x 25s 75°C, 1 x 25s 80°C, 3 x 25s 85°C	Heat left shoulder / upper limb / chest pleasant sensation centred on area of allodynia aroud left nipple
15	50-55	Carcinoma of Rectum, pelvic metastases	Yes – folinic acid, fluorouracil and irinotecan	No	Yes	Right lower limb (L5)	55 / 100 / 40	0	Dexamethazone, Oxycodone	Propofol, Fentanyl 80mcg	1 x 25s 75 °C, 1 x 25s 80 °C, 2 x 25s 85 °C	Heat right trunk, upper and lower limb
16	45-50	Carcinoma of Cervix, pelvic metatsases	Yes – fluorouracil and cisplatin	Yes	No	Left lower limb (L1-L4)	75 / 100 / 65	20	Naproxen, Dexamethazone, Gabapentin, Diazepam, Oxycodone	Propofol, Remifentanyl	2 x 75°C, 2 x 80°C, 1 x 85°C	Heat left trunk, upper and lower limb
17	50-55	Carcinoma of Lung, bone metastases and chest wall invasion	Yes – carboplatin and docetaxel	Yes	No	Left thoracic (T2-T6)	90 / 100 / 65	0	Etoricoxib, Amitryptiline, Pregabalin, Morphine	Propofol, Fentanyl	2 x 75°C, 1 x 80°C, 1 x 85°C	Burning left upper limb and upper trunk
18	60-65	Mesothelioma, chest wall invasion	Yes – pemetrexed, cisplatin and bevacizumab	No	Yes	Right thoracic (T3-T6)	50 / 80 / 45	0	Paracetamol, Naproxen, Gabapentin, Oxycodone	Propofol, Remifentanyl	2 x 75°C, 1 x 80°C, 1 x 85°C	Heat right chest wall and right arm
19	50-55	Carcinoma of Lung, bone metastases and chest wall invasion	Yes – carboplatin and docetaxel	Yes	No	Right thoracic and axilla (T2-T4)	45 / 90 / 10	0	Paracetamol, Dexamethazone, Gabapentin, Oxycodone	Propofol, Fentanyl	2 x 25s 75°C, 1 x 25s 85°C	Heavy hot sensation right upper limb and upper trunk
