# Supplementary material for: Spinal signalling of C-fiber mediated pleasant touch in humans
Source: eLife journal article supplement (doi:10.7554/elife.51642), 2019-12-24
Supplement: supp [file elife-51642-supp-v1.zip › elife_poa_e51642_Supplementary_file_2.xlsx]

## Sheet: Supplementary file 2a
	Pain Affected		Control
	Pre-cordotomy	Post-cordotomy	Pre-cordotomy	Post-cordotomy
	Median (IQR)	Median (IQR)	Median (IQR)	Median (IQR)
CDT (°C)	30.1 (29.5-30.8)	2.0 (0.0-12.0) ****	30.2 (29.8-30.5)	30.0 (29.4-30.2)
WDT (°C)	34.8 (34.3-35.3)	46.1 (39.8-48.1) ****	34.9 (34.5-35.1)	35.2 (34.8-35.5)
CPT (°C)	5.0 (1.4-12.0)	0.0 (0.0-1.0) ****	6.2 (3.1-10.5)	6.2 (1.2-10.8)
HPT (°C)	46.2 (44.8-47.8)	50.0 (49.1-50.0) ****	45.4 (43.9-46.9)	46.1 (44.6-46.8)
Graphesthesia (% correct)	100 (88.9-100)	100 (88.9-100)	88.9 (88.9-100)	100 (88.9-100)
	Mean (SD)	Mean (SD)	Mean (SD)	Mean (SD)
MDT (mN)	3.35 (0.80)	3.53 (0.86)	3.28 (0.83)	3.43 (0.86)
TPD (mm)	30.4 (5.6)	30.6 (5.9)	30.2 (5.3)	30.7 (6.3)
Itch rating (NRS 0-100)		0 (0)		35.6 (11.6)

## Sheet: Supplementary file 2b
Source of Variation	df	Pleasantness			Intensity			Quadratic Term			Intercept
		F	P	ƞ²partial	F	P	ƞ²partial	F	P	ƞ²partial	F	P
Time	1	0.81	0.38	0.043	12.166	0.003	0.403	0.226	0.64	0.012	0.687	0.418
Side	1	1.073	0.314	0.056	15.97	0.001	0.47	0.537	0.473	0.029	0.021	0.888
Velocity	2	24.727	<.0005	0.766	107.77	<.0005	0.927	N/A	N/A	N/A	N/A	N/A
Time x Side	1	0.029	0.867	0.002	22.349	<.0005	0.554	0.189	0.669	0.01	0.399	0.536
Time x Velocity	2	0.212	0.81	0.026	2.19	0.142	0.205	N/A	N/A	N/A	N/A	N/A
Side x Velocity	2	1.45	0.248	0.162	3.307	0.061	0.28	N/A	N/A	N/A	N/A	N/A
Time x Side x Velocity	2	0.441	0.647	0.032	0.362	0.702	0.041	N/A	N/A	N/A	N/A	N/A
