# Supplementary material for: Spinal signalling of C-fiber mediated pleasant touch in humans
Source: eLife journal article supplement (doi:10.7554/elife.51642), 2019-12-24
Supplement: supp [file elife-51642-supp-v1.zip › elife_poa_e51642_Supplementary_file_3.xlsx]

## Sheet: Supplementary file 3a
Sensory Descriptors	Emotional Descriptors
Bumpy	Arousing
Burning	Calming
Cold	Comfortable
Damp	Desirable
Dry	Discomfort
Fluffy	Exciting
Fuzzy	Irritating
Greasy	Pleasurable
Hairy	Sensual
Hard
Hot
Prickly
Rough
Sharp
Slippery
Smooth
Soft
Warm
Wet

## Sheet: Supplementary file 3b
Factor	Factor 1:				Factor 2:				Factor 3:				Factor 4:
Name	Texture / Roughness				Pile				Heat				Slip
Variance	0.394				0.14				0.101				0.084
Output	Regression		Correlation		Regression		Correlation		Regression		Correlation		Regression		Correlation
Descriptor and Loading	Bumpy	0.92	Hard	0.86	Warm	0.91	Fluffy	0.86	Hot	0.93	Hot	0.95	Slippery	0.86	Slippery	0.86
	Dry	0.82	Rough	0.85	Hairy	0.85	Soft	0.8	Burning	0.88	Burning	0.86	Greasy	0.86	Greasy	0.86
	Sharp	0.81	Sharp	0.84	Fuzzy	0.78	Smooth	0.79			Prickly	0.49
	Hard	0.79	Dry	0.76	Smooth	0.7	Hairy	0.76			Sharp	0.45
	Prickly	0.66	Prickly	0.76	Fluffy	0.65	Fuzzy	0.76
	Rough	0.64	Bumpy	0.64	Soft	0.53	Warm	0.71
	Warm	0.41	Smooth	-0.53			Hard	-0.51
	Fluffy	-0.42	Fluffy	-0.73			Rough	-0.71
	Soft	-0.54	Soft	-0.79

## Sheet: Supplementary file 3c
Factor	Factor 1:				Factor 2:				Factor 3:
Name	Positive Affect				Arousal				Negative Affect
Variance	0.656				0.148				0.081
Output	Regression		Correlation		Regression		Correlation		Regression		Correlation
Descriptor and Loading	Calming	1.01	Comfortable	0.97	Arousing	0.94	Arousing	0.9	Discomfort	0.98	Discomfort	0.95
	Comfortable	0.98	Pleasurable	0.97	Exciting	0.92	Sensual	0.89	Irritating	0.87	Irritating	0.93
	Pleasurable	0.97	Calming	0.95	Sensual	0.73	Exciting	0.89			Calming	-0.53
	Desirable	0.79	Desireble	0.95			Desirable	0.72			Comfortable	-0.57
			Sensual	0.72			Comfortable	0.61			Desirable	-0.58
			Arousing	0.54			Pleasurable	0.6			Pleasurable	-0.6
			Exciting	0.53			Calming	0.59
			Discomfort	-0.51
			Irritating	-0.61
